# Supplementary material
Source: Springer Nature journal article supplement (https://www.springermedizin.de/resource/supplementary/12885_2013_4988_MOESM1_ESM.pdf/9467918)

# DAPK

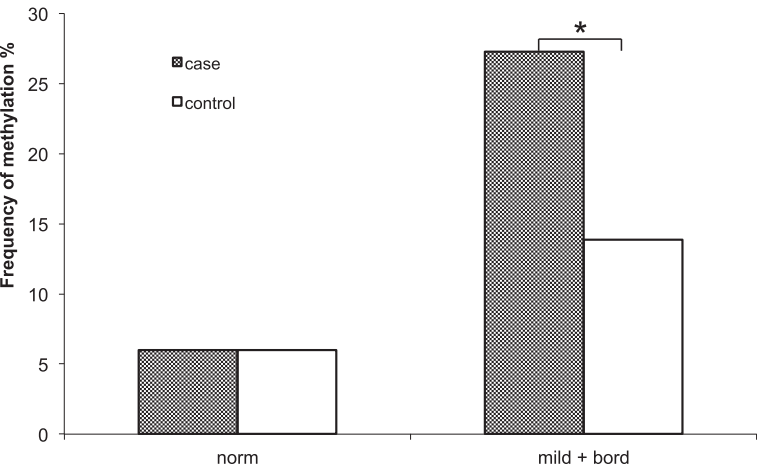

Supplement: MOESM1 [file 9467918]
